# Supplementary material for: The impact of S6K1 kinase on neuroblastoma cell proliferation is independent of GLI1 signaling
Source: PubMed Central journal article supplement (PMC4152578; doi:10.1186/1471-2407-14-600), 2014-08-18
Supplement: 12885_2014_4793_MOESM1_ESM.pdf [file 12885_2014_4793_MOESM1_ESM.pdf]

Figure S1

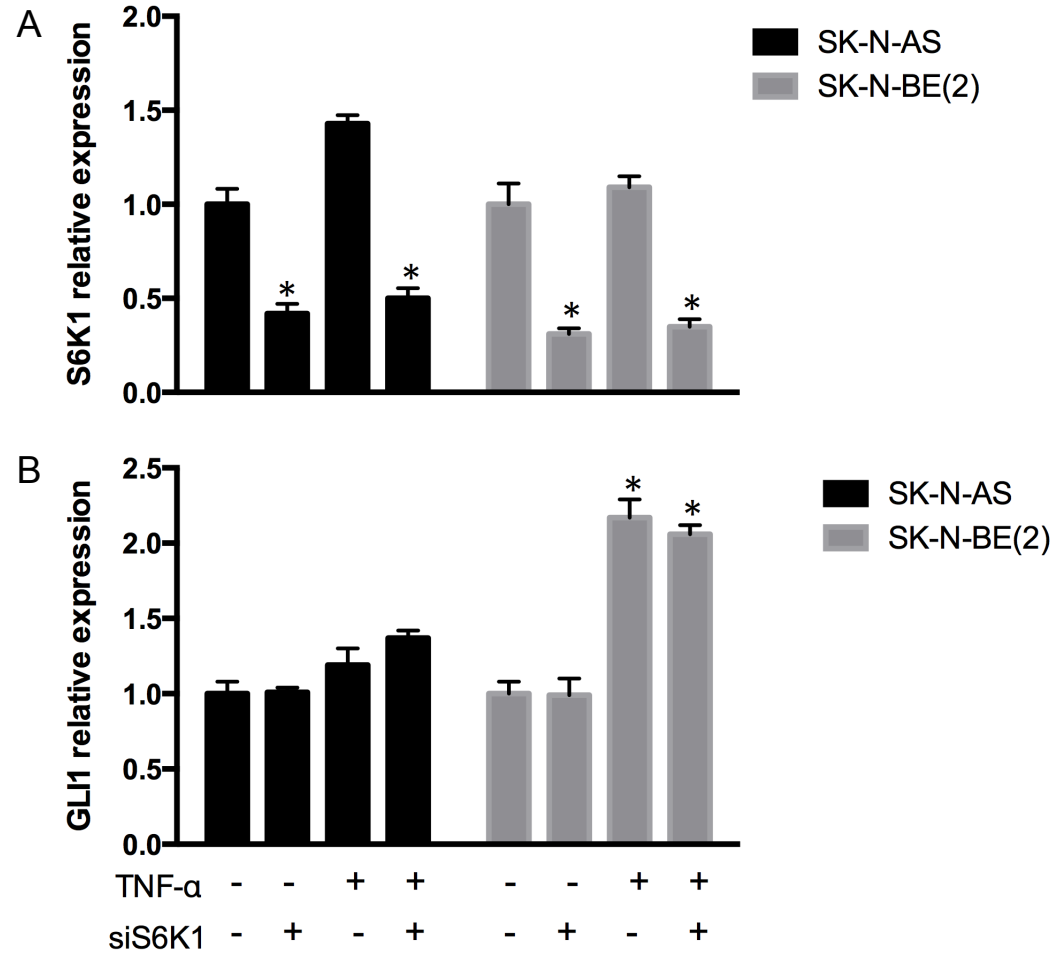

Figure S2

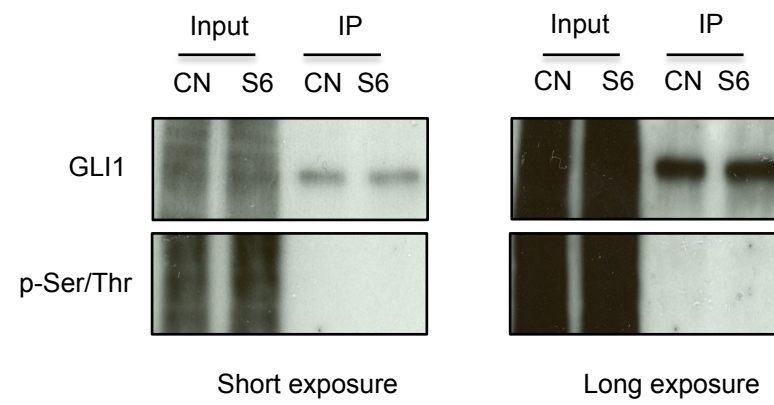

Figure S3

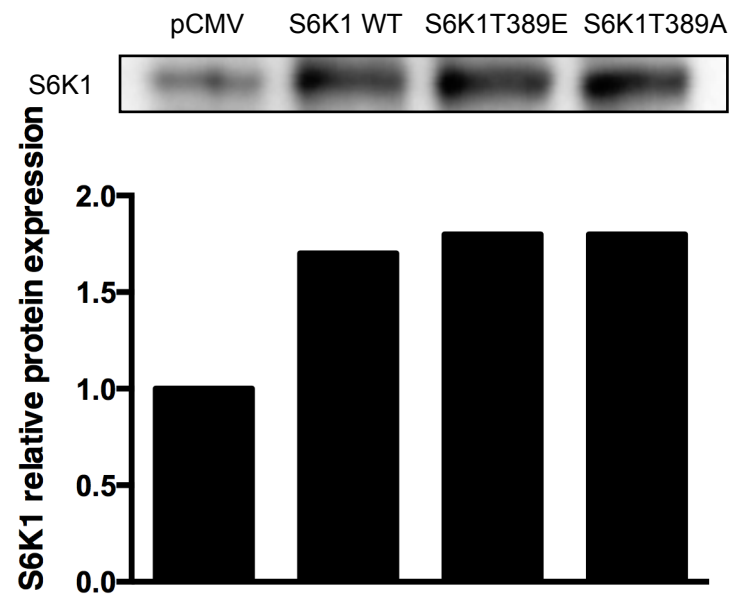

Table S1. Log IC50 values for GANT61 and combination of GANT61 and PI3K/mTOR inhibitors on neuroblastoma cell lines

|                     | SK-N-AS | SK-N-BE(2) |
|---------------------|---------|------------|
| GANT61              | 0.99    | 1.15       |
| GANT61 + AR-12      | 0.92    | 1.02       |
| GANT61 + CCI-779    | 0.91    | 0.89       |
| GANT61 + NVP-BEZ235 | 0.94    | 1.13       |
